# Supplementary material
Source: Springer Nature journal article supplement (https://www.springermedizin.de/resource/supplementary/12914_2012_234_MOESM1_ESM.pdf/9537074)

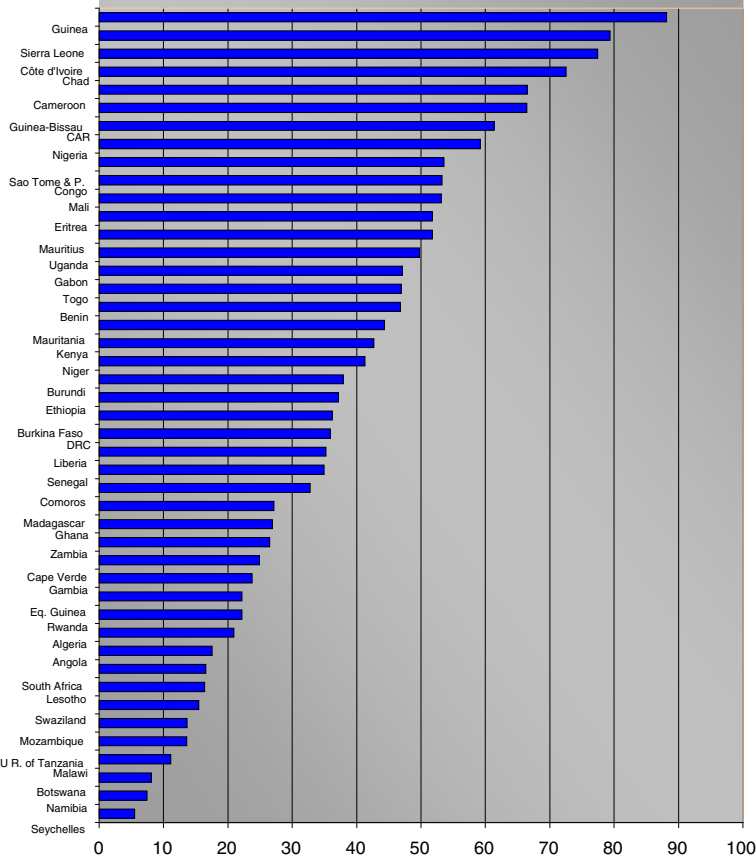

OOPs as % of THE

Supplement: MOESM1 [file 9537074]
